# Supplementary material for: Bridging substrate intake kinetics and bacterial growth phenotypes with flux balance analysis incorporating proteome allocation
Source: PubMed Central journal article supplement (PMC7062752; doi:10.1038/s41598-020-61174-0), 2020-03-09
Supplement: 41598_2020_61174_MOESM1_ESM.pdf [file 41598_2020_61174_MOESM1_ESM.pdf]

## 1 Supplementary Information to

## 2 Bridging substrate intake kinetics and bacterial growth phenotypes with flux 3 balance analysis incorporating proteome allocation

4 Hong Zeng <sup>1</sup>, Aidong Yang <sup>1\*</sup>

5 <sup>1</sup>Department of Engineering Science, University of Oxford, Parks Road, Oxford, OX1 3PJ, UK

6 \*Correspondence: [aidong.yang@eng.ox.ac.uk](mailto:aidong.yang@eng.ox.ac.uk)

7

## 8 Supplementary Text

### 9 Deriving the hyperbolic $\lambda - [g]$ correlation

10 From the Michaelis-Menten kinetics for carbon transport, the following correlation between  $w_c$  and the  
11 environmental substrate level has previously been proposed <sup>1</sup>

$$12 \quad w_c = w_{c,0} \left( 1 + \frac{K_{m,g}}{[g]} \right) \quad (S1)$$

13 where  $w_{c,0}$  is a constant that reflects the lowest proteome cost per unit carbon transport flux.  $[g]$  is the  
14 extracellular glucose concentration, where glucose is taken as a representative substrate.  $K_{m,g}$  is the Michaelis  
15 constant for glucose transport. We assumed a linear correlation between growth rate and glucose uptake rate  
16 according to ref. <sup>2</sup>

$$17 \quad v_c = \begin{cases} k_1 \lambda + b_1 & (\lambda < \lambda_{ac}) \\ k_2 \lambda + b_2 & (\lambda \geq \lambda_{ac}) \end{cases} \quad (S2)$$

18 where  $k_1, b_1, k_2, b_2$  are linear coefficients. Further based on the observed linear dependence of a proteome  
19 sector on growth rate <sup>3</sup>, we obtained the following for the E sector and the BM sector:

$$20 \quad \frac{\phi_E + \phi_{BM}}{\phi_{max}^o} = w_f^* v_f + w_r^* v_r + b^* \lambda = \begin{cases} k_3 \lambda + b_3 < 1 & (\lambda < \lambda_{ac}) \\ 1 & (\lambda \geq \lambda_{ac}) \end{cases} \quad (S3)$$

21 where  $k_3$  and  $b_3$  are linear coefficients. Substituting equations (S2-S3) into equation (16) of the main text (i.e.

22  $w_c^* v_c + w_f^* v_f + w_r^* v_r + b^* \lambda = \frac{\phi_{max}^g}{\phi_{max}^o}$ ), for non-overflow growth ( $\lambda < \lambda_{ac}$ ):

$$23 \quad w_c^* = \frac{\frac{\phi_{max}^g}{\phi_{max}^o} - (k_3 \lambda + b_3)}{(k_1 \lambda + b_1)} \quad (S4)$$

24 Comparing equation (S4) with equation (S1) (noted that  $w_c = w_c^* \phi_{max}^o$ ) gives

$$25 \quad \left( \frac{\frac{\phi_{max}^g}{\phi_{max}^o} - (k_3 \lambda + b_3)}{k_1 \lambda + b_1} \right) \phi_{max}^o = w_{c,0} \left( 1 + \frac{K_{m,g}}{[g]} \right) \quad (S5)$$

26 Rearranging equation (S5) to represent  $\lambda$  as a function of  $[g]$ :

$$27 \quad \lambda = \frac{(\phi_{max}^g - b_3 \phi_{max}^o - w_{c,0} b_1) [g] - w_{c,0} b_1 K_{m,g}}{(w_{c,0} k_1 + k_3 \phi_{max}^o) [g] + w_{c,0} k_1 K_{m,g}} \quad (S6)$$

28 Equation (S6) can be re-arranged to a hyperbolic form (equation (S30)). For example, this can be done by first  
29 dividing the numerator and the denominator of equation (S6) by  $w_{c,0} k_1$

1 
$$\lambda = \frac{\left(\frac{\phi_{max}^g}{w_{c,0}k_1} - \frac{\phi_{max}^o b_3}{w_{c,0}k_1} - \frac{b_1}{k_1}\right)[g] - \frac{b_1 K_{m,g}}{k_1}}{\left(\frac{\phi_{max}^o k_3}{w_{c,0}k_1} + 1\right)[g] + K_{m,g}} \quad (S7)$$

2 Introducing a facilitating term  $\left(+ \frac{b_1}{k_1} \frac{\phi_{max}^o k_3}{w_{c,0}k_1} [g] - \frac{b_1}{k_1} \frac{\phi_{max}^o k_3}{w_{c,0}k_1} [g]\right)$  to the numerator of equation (S7)

3 
$$\lambda = \frac{\left(\frac{\phi_{max}^g - \phi_{max}^o b_3}{w_{c,0}k_1}\right)[g] - \frac{b_1}{k_1}[g] - \frac{b_1 K_{m,g}}{k_1} + \frac{b_1 \phi_{max}^o k_3}{k_1 w_{c,0}k_1} [g] - \frac{b_1 \phi_{max}^o k_3}{k_1 w_{c,0}k_1} [g]}{\left(\frac{\phi_{max}^o k_3}{w_{c,0}k_1} + 1\right)[g] + K_{m,g}} \quad (S8)$$

4 Lumping the  $\frac{b_1}{k_1}$  related terms together

5 
$$\lambda = \frac{\left(\frac{\phi_{max}^g - \phi_{max}^o b_3 + b_1 \phi_{max}^o k_3}{w_{c,0}k_1}\right)[g] - \frac{b_1}{k_1} \left(\frac{\phi_{max}^o k_3}{w_{c,0}k_1} + 1\right)[g] + K_{m,g}}{\left(\frac{\phi_{max}^o k_3}{w_{c,0}k_1} + 1\right)[g] + K_{m,g}} \quad (S9)$$

6 Finally, rearranging equation (S9) to obtain a hyperbolic  $\lambda - [g]$  correlation

7 
$$\lambda = \frac{\phi_{max}^g - \phi_{max}^o \left(b_3 - \frac{b_1}{k_1} k_3\right)}{w_{c,0}k_1 + \phi_{max}^o k_3} \frac{[g]}{[g] + \frac{w_{c,0}k_1}{w_{c,0}k_1 + \phi_{max}^o k_3} K_{m,g}} - \frac{b_1}{k_1} \quad (S10)$$

9 Similarly for overflow growth ( $\lambda \geq \lambda_{ac}$ ), substituting equations (S2-S3) into equation (16) of the main text

10 
$$w_c^* = \frac{\frac{\phi_{max}^g}{\phi_{max}^o} - 1}{k_2 \lambda + b_2} \quad (S11)$$

11 Comparing equation (S11) with equation (S1)

12 
$$\left(\frac{\frac{\phi_{max}^g}{\phi_{max}^o} - 1}{k_2 \lambda + b_2}\right) \phi_{max}^o = w_{c,0} \left(1 + \frac{K_{m,g}}{[g]}\right) \quad (S12)$$

13 Rearrange equation (S12) to represent  $\lambda$  as a function of  $[g]$

14 
$$\lambda = \frac{\phi_{max}^g - \phi_{max}^o}{w_{c,0}k_2} \frac{[g]}{[g] + K_{m,g}} - \frac{b_2}{k_2} \quad (S13)$$

15 Comparing equations (S10) and (S13) with the Monod equation, i.e.  $\lambda = \lambda_{max} \frac{[g]}{[g] + K_s}$ , we obtain the following matches (also see equation (S30)):

17 
$$\lambda_{max} = \begin{cases} \frac{\phi_{max}^g - (\phi_{max}^o b_3 + w_{c,0} b_1)}{w_{c,0}k_1 + \phi_{max}^o k_3} & (\lambda < \lambda_{ac}) \\ \frac{\phi_{c,min} - w_{c,0} b_2}{w_{c,0}k_2} & (\lambda \geq \lambda_{ac}) \end{cases} \quad (S14)$$

18 and

19 
$$K_s = \begin{cases} \frac{w_{c,0}k_1}{w_{c,0}k_1 + \phi_{max}^o k_3} K_{m,g} & (\lambda < \lambda_{ac}) \\ K_{m,g} & (\lambda \geq \lambda_{ac}) \end{cases} \quad (S15)$$

20 Below we show how to resolve the physical links between the Monod kinetic parameters ( $\lambda_{max}$  and  $K_s$ ) and  
 21 cell's physiological state through analyzing the biological meaning of the denominator and the numerator of  
 22 equations (S14-S15).

23

1 **Resolving  $\lambda_{max}$**

2 Starting with the non-overflow scenario ( $\lambda < \lambda_{ac}$ ), we first focus on the numerator of the derived expression  
 3 of  $\lambda_{max}$  (equation (S14)).  $b_3$  is the proteome fraction accounting for non-growth maintenance in E and BM  
 4 sectors (normalised by  $\phi_{max}^o$ ; cf. equation (S3)), therefore

$$5 \quad \phi_{max}^o b_3 = (\phi_E + \phi_{BM})_{atpm} \quad (S16)$$

6 where the subscript *atpm* denotes the proteome fraction occupied by non-growth-associated maintenance.  
 7 Furthermore,  $b_1$  is the rate of carbon intake for maintenance purposes, therefore the product of  $b_1$  and  $w_{c,0}$   
 8 (lowest enzyme cost per unit carbon influx, equation (S1)) quantifies the (lowest) portion of the C sector  
 9 proteome that is occupied for maintenance.

$$10 \quad w_{c,0} b_1 = \phi_{C,atpm} \quad (S17)$$

11 Combining equations (S16) and (S17), the numerator of equation (S14) (the branch for  $\lambda < \lambda_{ac}$ ) can be  
 12 expressed as

$$13 \quad \phi_{max}^g - (\phi_{E,atpm} + \phi_{BM,atpm} + \phi_{C,atpm}) = \phi_{max}^g - \sum_i \phi_{i,atpm} \quad (S18)$$

14 where  $i$  represents a proteome sector (C, E, or BM). Moving on to the denominator,  $w_{c,0} k_1$  can be coupled to  
 15 the carbon influx (via equation (S2)), thus representing the (lowest) demand of C sector proteome per unit  
 16 increase of growth rate, denoted by  $p_c$

$$17 \quad w_{c,0} k_1 = w_{c,0} \frac{dv_c}{d\lambda} = \left( \frac{d\phi_C}{d\lambda} \right)_{w_c=w_{c,0}} = p_c \quad (S19)$$

18 Similarly  $\phi_{max}^o k_3$  is the summation of the proteome cost (per unit increase of growth rate) for E and BM  
 19 sectors (cf. equation (S3))

$$20 \quad \phi_{max}^o k_3 = \frac{d\phi_E}{d\lambda} + \frac{d\phi_{BM}}{d\lambda} = p_E + p_{BM} \quad (S20)$$

21 Combining equations (S19) and (S20), the denominator ( $w_{c,0} k_1 + \phi_{max}^o k_3$ ) can be expressed as  $p_c + p_E +$   
 22  $p_{BM} \equiv \sum_i p_i$ , where  $i$  represents a proteome sector (C, E, or BM). Summarising, the maximum specific growth  
 23 rate for non-overflow growth can be quantified as

$$24 \quad \lambda_{max} = \frac{\phi_{max}^g - \sum_i \phi_{i,atpm}}{\sum_i p_i} \quad (\lambda < \lambda_{ac}) \quad (S21)$$

25 During acetate overflow ( $\lambda \geq \lambda_{ac}$ ), the numerator of the derived expression of  $\lambda_{max}$  in equation (S14) can be  
 26 viewed as the (adjusted) proteome abundance of C sector, denoted as  $\phi'_c$  below, which is made proportional  
 27 to  $\lambda$  by applying an offset term  $w_{c,0} b_2$  (Fig. S2).

$$28 \quad \phi_{c,min} - w_{c,0} b_2 = \phi'_c \quad (S22)$$

29 On the other hand, the denominator  $w_{c,0} k_2$  is comparable with equation (S19), which represents the (lowest)  
 30 demand of C sector proteome per unit increase of growth rate ( $p_c$ ) under overflow conditions, i.e.

$$31 \quad w_{c,0} k_2 = p_c \quad (S23)$$

32 Thus, during acetate overflow  $\lambda_{max}$  can be interpreted as

$$33 \quad \lambda_{max} = \frac{\phi'_c}{p_c} \quad (\lambda \geq \lambda_{ac}) \quad (S24)$$

34 which suggests that under such condition  $\lambda_{max}$  could be dictated only by the characteristics of the carbon-  
 35 scavenging sector. Equations (S21) and (S24) can be generalised as

$$36 \quad \lambda_{max} = \frac{\phi_{growth}}{p_{growth}} \quad (S25)$$

1 where  $\phi_{growth}$  represents the fraction of the growth-controlling proteome, and  $p_{growth}$  denotes the  
2 proteome cost per unit increase of growth rate.

### 3 **Resolving $K_s$**

4 Re-writing equation (S15) to

$$5 \quad K_s = \delta K_{m,g} \quad (S26)$$

$$6 \quad \delta = \begin{cases} \frac{w_{c,0}k_1}{w_{c,0}k_1 + \phi_{max}^o k_3} < 1 \quad (\lambda < \lambda_{ac}) \\ 1 \quad (\lambda \geq \lambda_{ac}) \end{cases} \quad (S27)$$

7 We showed that the Monod constant  $K_s$  is linked to the Michaelis constant for carbon transport  $K_{m,g}$  through  
8 a proportional factor  $\delta$  that possesses discrete values. Given the above analysis for  $\lambda_{max}$ , the biological  
9 meaning of the expression of  $\delta$  (for  $\lambda < \lambda_{ac}$ ) could be shown through

$$10 \quad \delta = \frac{w_{c,0}k_1}{w_{c,0}k_1 + \phi_{max}^o k_3} = \frac{p_c}{p_c + p_E + p_{BM}} < 1 \quad (S28)$$

11 For the overflow scenario ( $\lambda \geq \lambda_{ac}$ ),  $\delta = 1$  actually derives from

$$12 \quad \delta = \frac{w_{c,0}k_2}{w_{c,0}k_2} = \frac{p_c}{p_c} = 1 \quad (S29)$$

13 Overall, the discrete feature of the proportional factor  $\delta$  reflects the switch in a cell's metabolic state (due to  
14 global proteome allocation).

### 15 **Parameterization of $w_c - [g]$ correlation (determining $\phi_{max}^g$ and $w_{c,0}$ )**

16 Equations (S10) and (S13) can be written in a generic form

$$17 \quad \lambda = A \frac{[g]}{[g] + B} - C \quad (S30)$$

18 In 1965, Pirt explicitly pointed out that in bacteria some substrate is consumed for functions other than the  
19 synthesis of new cells<sup>4</sup>. As mentioned in the main text, the original Monod equation does not recognize such  
20 non-growth maintenance. Throughout the years researchers have modified the classic Monod equation by  
21 expressing the maintenance as the maintenance rate<sup>4-6</sup>, maintenance coefficient<sup>4,7,8</sup> or the threshold  
22 substrate concentration ( $S_{min}$ )<sup>9-12</sup>. In this work, term  $C$  denotes the cellular maintenance. Consequently  $\lambda_{max}$   
23 could be computed by  $A - C$  and  $K_s$  is equivalent to  $B$ . If maintenance is negligible,  $C = 0$  (thus  $b_1 = b_3 = 0$ );  
24 equation (S30) reduces to the original Monod equation.

25 For *E. coli*, the experimentally measured  $\lambda - [g]$  profile has been extensively reported in literature. With a  
26 proper set of data, constants  $A$ ,  $B$  and  $C$  can readily be determined by fitting the growth data to equation  
27 (S30). It is worth nothing that the shape of a  $\lambda - [g]$  curve is generally determined by the slow-growing region  
28 where growth rate changes dramatically with the substrate concentration<sup>13</sup>. Therefore, we chose to fit the  
29 growth data to the non-overflow  $\lambda - [g]$  correlation (equation (S10)).

$$30 \quad A = \frac{\phi_{max}^g - \phi_{max}^o \left( b_3 - \frac{b_1}{k_1} k_3 \right)}{w_{c,0}k_1 + \phi_{max}^o k_3} \quad (S31)$$

$$31 \quad B = \frac{w_{c,0}k_1}{w_{c,0}k_1 + \phi_{max}^o k_3} K_{m,g} \quad (S32)$$

$$32 \quad C = \frac{b_1}{k_1} \quad (S33)$$

33  $k_1 - k_3$  and  $b_1 - b_3$  (Table S3) are the known parameters that are dictated by the stoichiometry of the  
34 metabolic model.  $\phi_{max}^o$  was previously reported to be 0.19 for *E. coli* NCM3722<sup>14</sup>. We did not find similar data  
35 for *E. coli* ML308; therefore we set  $\phi_{max}^o = 0.19$  for both strains. The values of  $A$  and  $B$  were fitted to the  
36 experimental data ( $\lambda - [g]$  profile) through fixing  $C = \frac{b_1}{k_1}$ . The unknown parameters are:  $\phi_{max}^g$ ,  $w_{c,0}$  and  $K_{m,g}$ ,

1 which are located in equations (S31) and (S32). As we were not able to determine three unknowns with two  
 2 equations, the value of one unknown needed to be specified to determine the rest. We chose  $K_{m,g}$  to be  
 3 specified as its value has been extensively reported in literature (in a range of 4 – 20  $\mu M$ <sup>15–22</sup>). Given a known  
 4  $K_{m,g}$  we could proceed to determine the other parameters. It is worth noting that proteome fraction  $\phi_{max}^g$  has  
 5 to be less than one, which further constrains the feasible range of  $K_{m,g}$  (via equation (S35)).

$$6 \quad w_{c,0} = \frac{\phi_{max}^o B}{k_1(K_{m,g} - B)} \quad (S34)$$

$$7 \quad \phi_{max}^g = \phi_{max}^o \left( k_3 \frac{AK_{m,g}}{K_{m,g} - B} - k_3 C + b_3 \right) < 1 \quad (S35)$$

8 For strain NCM3722, we fixed  $C = 0$  (due to negligible maintenance) and fitted the experimentally determined  
 9  $\lambda - [g]$  profile of the same strain (SI figure 1 of ref.<sup>23</sup>) to equation (S30), which gives  $A = 1 \text{ h}^{-1}$  and  $B = 5 \mu M$ .  
 10  $K_{m,g}$  needs to be higher than 6.6  $\mu M$  to allow  $\phi_{max}^g < 1$ . We set  $K_{m,g} = 15 \mu M$  according to refs.<sup>20,21</sup>, which  
 11 satisfactorily describes the measured  $\lambda - [g]$  data (Fig. S3a). Similarly for strain ML308, we fixed  $C = \frac{b_1}{k_1} =$   
 12 0.0036. The experimental growth data (figure 1 of ref.<sup>24</sup>) leads to  $A = 1.2 \text{ h}^{-1}$  and  $B = 12.4 \mu M$ . In this case  
 13  $K_{m,g}$  has to be higher than 17.6  $\mu M$  to ensure  $\phi_{max}^g < 1$ . We set  $K_{m,g}$  to 20  $\mu M$  as it gives the best fit to the  
 14 experimental data (Figs. S3b and S3c). Substituting  $A$ ,  $B$ ,  $C$  and  $K_{m,g}$  values into equations (S34-S35),  $\phi_{max}^g$  and  
 15  $w_{c,0}$  could be computed (Table S1). Inserting the calculated value of  $w_{c,0}$  and the associated  $K_{m,g}$  specified  
 16 above into equation (S1), we were able to compute  $w_c$  given glucose concentration:

$$17 \quad w_{c,NCM3722} = 0.0097(1 + 15/[g]) \quad (S36)$$

$$18 \quad w_{c,ml308} = 0.0381(1 + 20/[g]) \quad (S37)$$

19 where  $[g]$  is in  $\mu M$ . The calculated values of  $\phi_{max}^g$  were adopted in the proteome allocation constraints to  
 20 simulate the cell growth (equation (19) of the main text).

## 21 **Determining the proteome cost parameters**

22 The model comprises four proteome cost parameters denoting the proteome cost per unit flux (see equation  
 23 (16) of the main text):  $w_c^*$ ,  $w_f^*$ ,  $w_r^*$  and  $b^*$ . The variable  $w_c^*$  could be calculated via dividing equations (S36-S37)  
 24 by  $\phi_{max}^o$ . The rest of the proteome cost parameters (i.e.  $w_f^*$ ,  $w_r^*$  and  $b^*$ ) could be determined via the  
 25 experimentally determined acetate production rate against growth rate profile (referred to as the acetate line)  
 26 and the respiration flux against growth rate profile (referred to as the respiration line). As no directly  
 27 measured respiration line were reported along with the acetate line, we fixed the growth rate and acetate  
 28 excretion flux according to the acetate line and performed FBA simulation with minimizing glucose uptake rate  
 29 as the objective function to obtain an estimated respiration line. The slope and intercept of the acetate line  
 30 and the respiration line were used to determine  $w_f^*$ ,  $w_r^*$  and  $b^*$  (Table S1) following the approach detailed in  
 31 ref.<sup>25</sup>.

## 32 **Comments on the approach for determining model parameters**

33 The model proposed in this work comprises five critical parameters:  $w_c$ ,  $w_f$ ,  $w_r$ ,  $b$ ,  $\phi_{max}^o$  and  $\phi_{max}^g$  (or  
 34 equivalently,  $w_c^*$ ,  $w_f^*$ ,  $w_r^*$ ,  $b^*$  and  $\phi_{max}^g/\phi_{max}^o$ ), among which  $w_c$  is a variable (depending on extracellular  
 35 glucose concentration) while the rest are constants. The determination of  $w_c$  relies on two parameters ( $w_{c,0}$   
 36 and  $K_{m,g}$ ) involved in the  $w_c - [g]$  correlation (equation (S1)).  $K_{m,g}$  is the Michaelis constant for carbon  
 37 transport, which has been extensively reported in literatures. From Mori *et al.*'s original work<sup>1</sup>,  $w_{c,0}$  combines  
 38 several physiological parameters, including cell dry weight, molecular weight of carbon transport enzymes,  
 39 mass of total proteins in a cell, enzyme turnover rate and the mass fraction of carbon transport enzymes. It is  
 40 unlikely to directly compute  $w_{c,0}$  unless all these parameters (including  $K_{m,g}$ ) were measured in a consistent  
 41 set of experiments. To circumvent this difficulty, in this work we have essentially treated  $w_{c,0}$  as a  
 42 phenomenological parameter and determined it using bioreactor-level growth data, i.e. the  $\lambda - [g]$  profile. On  
 43 the other hand, previous work has shown that a set of  $w_f$ ,  $w_r$  and  $b$  could be determined if we know the

1 information of measured acetate excretion and (measured or deduced) respiration flux<sup>25</sup>. Finally  $\phi_{max}^o$  and  
 2  $\phi_{max}^g$ , by their definition, could be obtained directly from quantitative proteome analysis. If the proteome data  
 3 is not available,  $\phi_{max}^g$  could be estimated via the experimentally determined  $\lambda - [g]$  profile, as done in this  
 4 work. One can see that the maximum value of  $\phi_c$  ( $\phi_{Cmax}$ ) is directly associated to  $\phi_{max}^g$  (equation (2), Figs. 2a  
 5 and 2b of the main text), which in turn is affected by  $\phi_{max}^o$  and  $K_s$  (i.e.  $B$ ) in equations (S34-S35). In fact, it was  
 6 primarily the much larger  $K_s$  of ML308 than that of NCM3722 which led to a much larger  $\phi_{Cmax}$  (and  $\phi_{max}^g$ ) of  
 7 the former.  $K_s$  is known to be sensitive to growth conditions and culture history<sup>10,24,26</sup>, hence its estimated  
 8 value can be very much attached to the particular set of cell culture data used. Therefore, the  
 9 parameterization results obtained as such need to be treated with caution.

## 10 Formulating the mixed integer linear programming (MILP) problem

11 The constraint  $w_c^* v_c = \phi_{max}^g / \phi_{max}^o - 1$  ( $\lambda \geq \lambda_{ac}$ ) in equation (19) of the main text is derived from equation  
 12 (17), meaning that  $w_c^* v_c$  equals to a constant,  $\phi_{max}^g / \phi_{max}^o - 1$ , at  $v_f > 0$ . It ensures that the acetate  
 13 production (i.e. the activation of the fermentation pathway) occurs simultaneously with the activation of the  
 14 equal sign of the proteome constraint for overflow metabolism (equation (15) of the main text), i.e.  $v_f > 0$  at  
 15  $w_f^* v_f + w_r^* v_r + b^* \lambda = 1$ . To avoid introducing a conditional constraint in the FBA model, this constraint can be  
 16 re-expressed as

$$17 \quad z v_f = 0 \quad (z = 0 \text{ or } 1) \quad (S38)$$

$$18 \quad [w_c^* v_c - \theta](1 - z) = 0 \quad (S39)$$

19 where  $\theta = \phi_{max}^g / \phi_{max}^o - 1$ . To further avoid solving a non-linear optimisation problem, we converted the  
 20 bilinear term  $z v_f$  in equation (S38) to:

$$\begin{aligned} 21 \quad & y_1 = z v_f \\ 22 \quad & y_1 \leq z v_{f,max} \\ 23 \quad & y_1 \leq v_f \\ 24 \quad & y_1 \geq v_f - v_{f,max}(1 - z) \\ 25 \quad & y_1 \geq 0 \end{aligned}$$

26 Similarly, the bilinear term  $z v_c$  in equation (S39) was converted to

$$\begin{aligned} 27 \quad & y_2 = z v_c \\ 28 \quad & y_2 \leq z v_{c,max} \\ 29 \quad & y_2 \leq v_c \\ 30 \quad & y_2 \geq v_c - v_{c,max}(1 - z) \\ 31 \quad & y_2 \geq 0 \end{aligned}$$

32 where  $y_1, y_2$  are continuous variables,  $z$  is a binary variable ( $z = 0$  or  $1$ ).  $v_{f,max} = 1000$ ,  $v_{c,max} = 1000$ .  
 33 Overall we have the following MILP problem, which is mathematically equivalent to the original problem  
 34 (equation (19) of the main text):

$$\begin{array}{ll} \text{maximise } \lambda & \\ \text{subject to} & S v = 0 \\ & lb \leq v_i \leq ub \\ & w_f^* v_f + w_r^* v_r + b^* \lambda \leq 1 \\ & w_c^* v_c + w_f^* v_f + w_r^* v_r + b^* \lambda = \phi_{max}^g / \phi_{max}^o \\ & y_1 = 0 \\ & w_c^* v_c - \theta + \theta z - w_c^* y_2 = 0 \\ & y_1 \leq z v_{f,max} \\ & z = 0 \text{ or } 1 \end{array} \quad \begin{array}{l} y_1 \leq v_f \\ y_1 \geq v_f - v_{f,max}(1 - z) \\ y_2 \leq z v_{c,max} \\ y_2 \leq v_c \\ y_2 \geq v_c - v_{c,max}(1 - z) \\ y_1 \geq 0 \\ y_2 \geq 0 \end{array}$$

35

36

1 Supplementary Figures and Tables

2

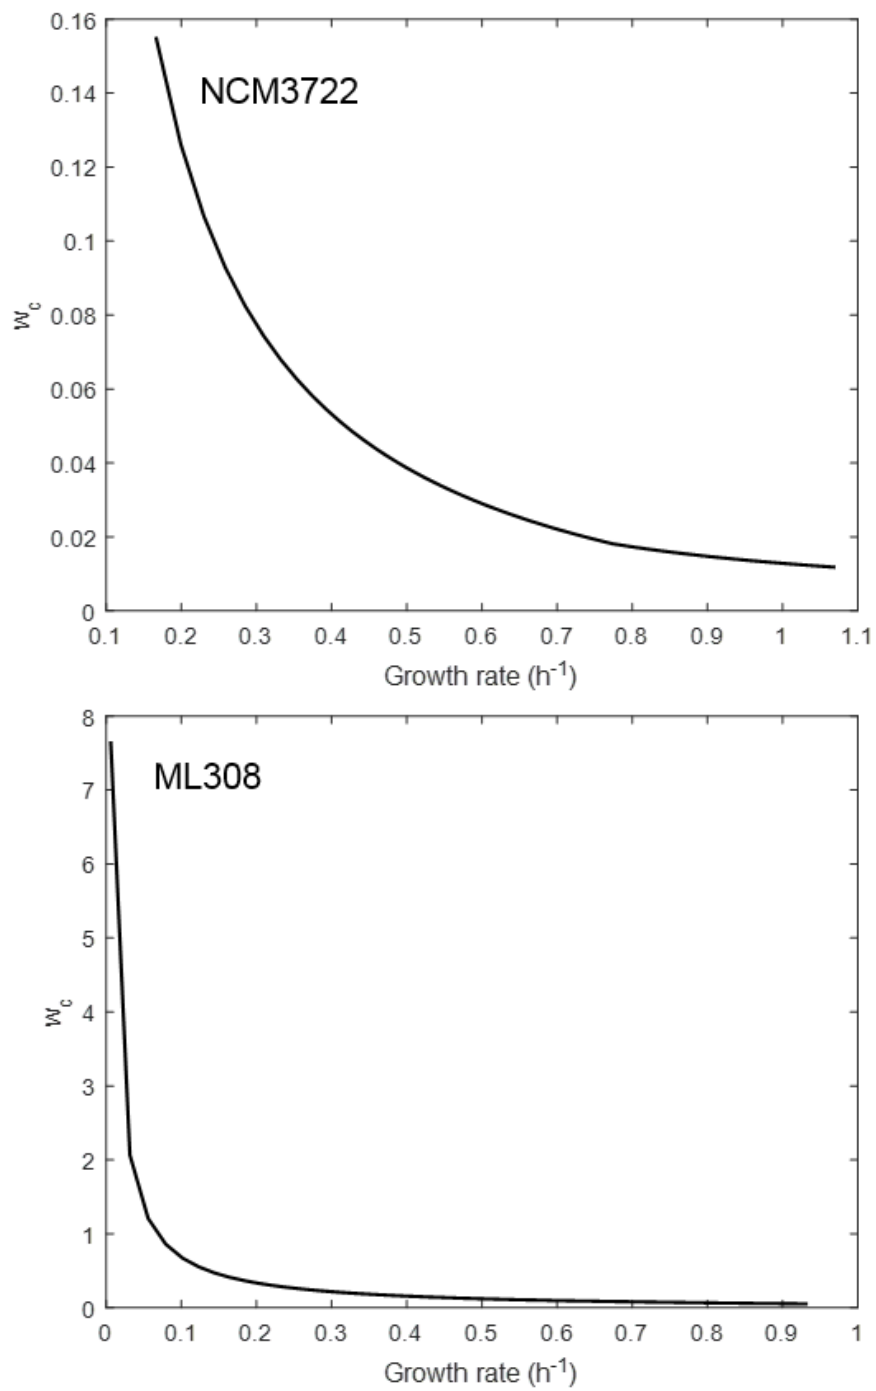

3

4 **Figure S1.** Variation of  $w_c$  against simulated specific growth rate for NCM3722 and ML308.

5

6

1

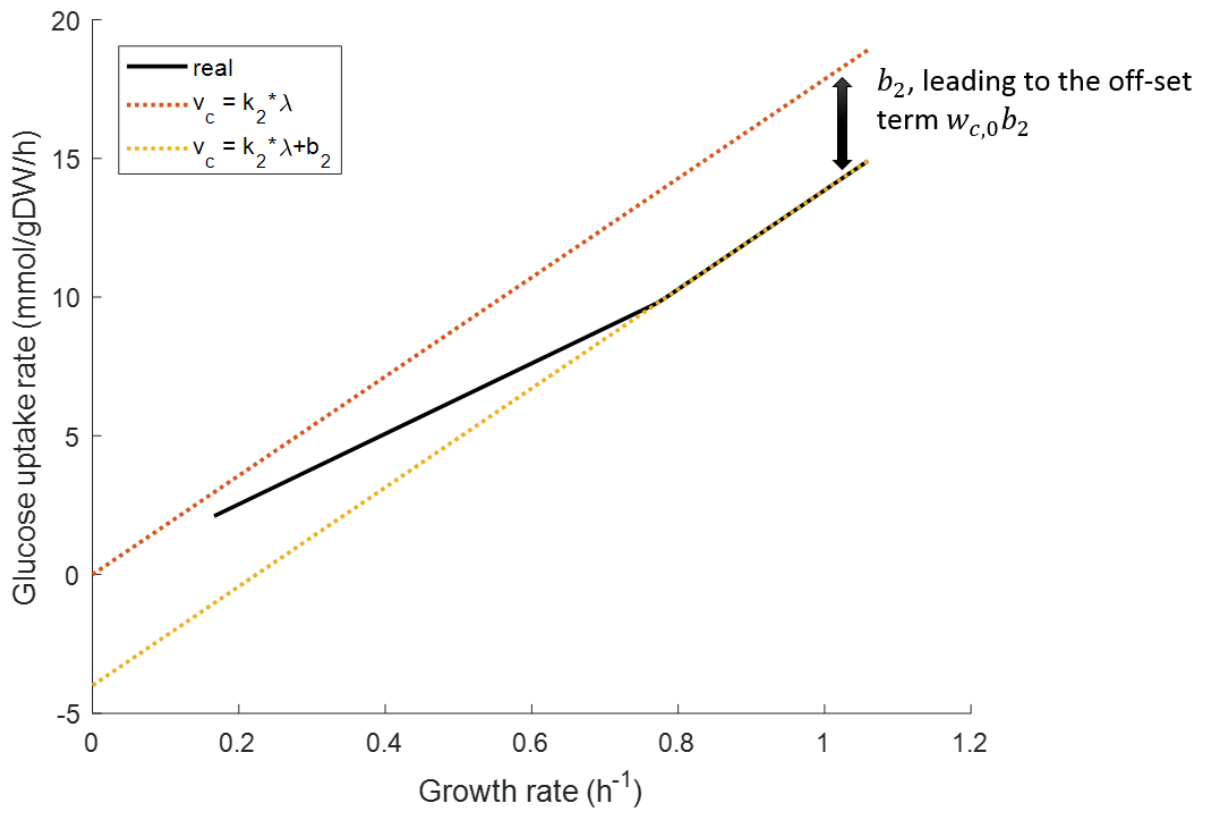

2

3 **Figure S2.** Difference between the real, proportional and linear correlation between  $v_c - \lambda$  pair, which results  
4 in an offset term  $w_{c,0} b_2$  in equation (S22).

5

6



1

2

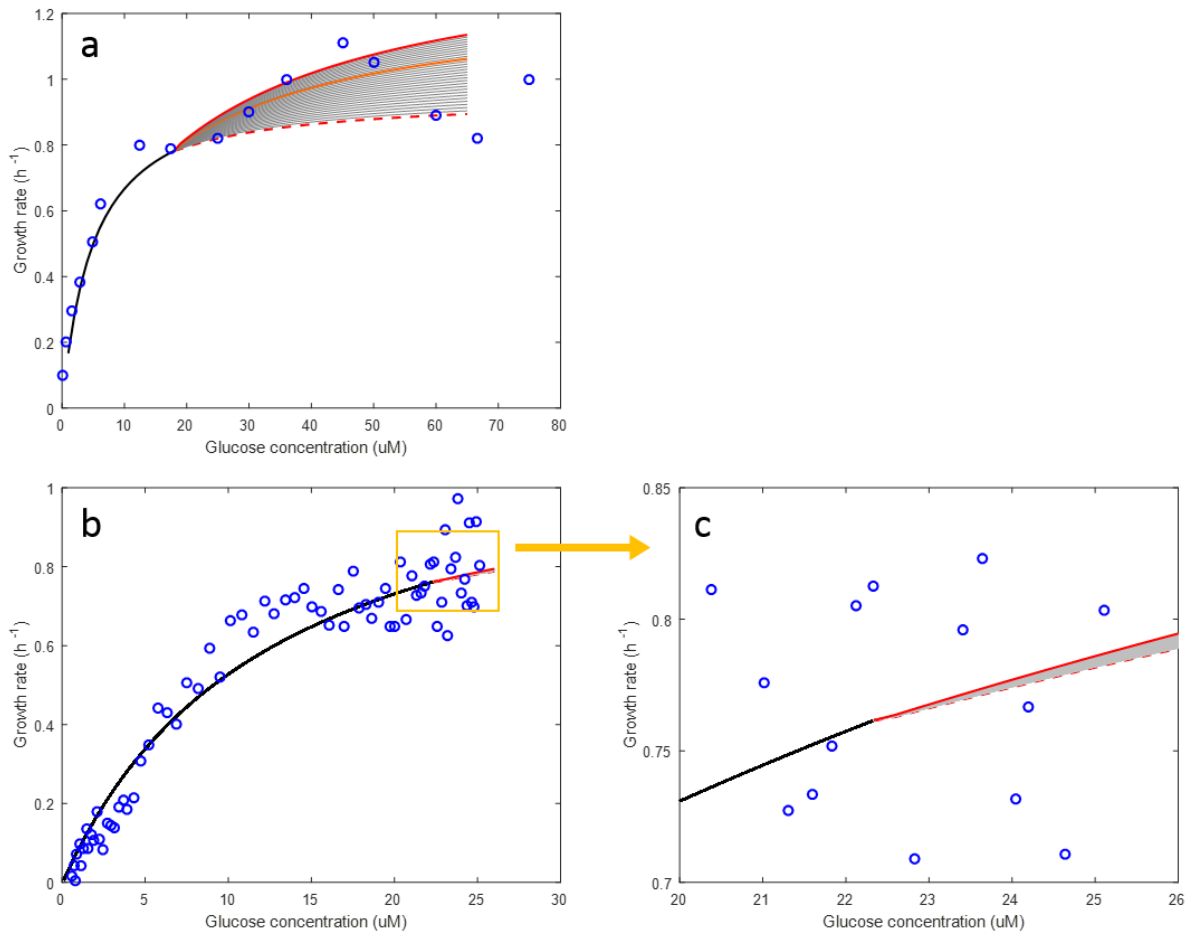

3

4 **Figure S3.** Impact of varying  $K_{m,g}$  on predicted  $\lambda - [g]$  profile. **(a)** Comparison between the simulated (upon  
5 varying  $K_{m,g}$ ) and measured  $\lambda - [g]$  profile for NCM3722. Blue circles are the experimental data obtained  
6 from SI figure 1 of ref. <sup>23</sup>. For  $\lambda < \lambda_{ac}$  ( $\sim 0.8$ ) simulated  $\lambda - [g]$  correlation is described by equation (S10). For  
7  $\lambda \geq \lambda_{ac}$ , the simulation result is governed by equation (S13). In the overflow region, the variation of  $K_{m,g}$   
8 results in different model predictions. Grey area:  $K_{m,g}$  varies between  $5.5 - 20 \mu M$ . Red dashed line:  $K_{m,g} =$   
9  $5.5 \mu M$ , orange solid line:  $K_{m,g} = 15 \mu M$  (best fit for NCM3722), red solid curve:  $K_{m,g} = 20 \mu M$ . **(b-c)**  
10 Comparison between the simulated (upon varying  $K_{m,g}$ ) and measured  $\lambda - [g]$  profile for ML308. Blue circles  
11 are the experimental data obtained from figure 1 of ref. <sup>24</sup>. For  $\lambda < \lambda_{ac}$  ( $\sim 0.76$ ) simulated  $\lambda - [g]$  correlation is  
12 described by equation (S10). For  $\lambda \geq \lambda_{ac}$ , the simulation result is governed by equation (S13). In the overflow  
13 region, the variation of  $K_{m,g}$  results in different model predictions. Grey area:  $K_{m,g}$  varies between  $15 -$   
14  $20 \mu M$ . Red dashed line:  $K_{m,g} = 15 \mu M$ , red solid curve:  $K_{m,g} = 20 \mu M$  (best fit for ML308).

15

1

2 **Table S1.** Parameters involved in the proteome allocation constraints.

| Parameter<br>(Units)      | Description                                                  | Value  |         | Source    |
|---------------------------|--------------------------------------------------------------|--------|---------|-----------|
|                           |                                                              | ML308  | NCM3722 |           |
| $b^*$<br>(gDW h/mmol)     | Normalized proteome cost per unit biomass synthesis flux     | 0.1    | 0.1     | This work |
| $k_f$<br>(mmol/gDW)       | Slope of the acetate line                                    | 22.38  | 19.28   |           |
| $k_r$<br>(mmol/gDW)       | Slope of the respiration line                                | -9.80  | -2.84   |           |
| $v_{f,0}$<br>(mmol/gDW/h) | y-axis intercept of the acetate line                         | -16.17 | -14.42  |           |
| $v_{r,0}$<br>(mmol/gDW/h) | y-axis intercept of the respiration line                     | 9.76   | 8.65    |           |
| $w_{c,0}$<br>(gDW h/mmol) | Lowest enzyme cost per unit carbon transport flux            | 0.0381 | 0.0097  |           |
| $w_f^*$<br>(gDW h/mmol)   | Normalized enzyme cost per unit fermentation flux            | 0.1470 | 0.0157  |           |
| $w_r^*$<br>(gDW h/mmol)   | Normalized enzyme cost per unit respiration flux             | 0.3458 | 0.1417  |           |
| $\phi_{max}^g$ (-)        | Maximal proteome fraction attainable for C, E and BM sectors | 0.7728 | 0.3680  |           |
| $\phi_{max}^o$ (-)        | Maximal proteome fraction attainable for BM and E sectors    | 0.19   |         |           |

3

4 Note:

5  $k_f$  and  $v_{f,0}$  were determined from the experimentally determined acetate line. For ML308, data were obtained  
6 from table 7 of ref. <sup>27</sup>. For NCM3722, data were obtained from figure 1 of ref. <sup>14</sup>.7  $k_r$  and  $v_{r,0}$  were obtained from FBA simulated respiration line.

8

9

10

1

2 **Table S2.** Reported values of the maintenance coefficient and the molar growth yield and fitted energy  
3 parameters for different *E. coli* strains.

| Strain  | $m$<br>(mmol/gDW/h) | $Y_G$<br>(gDW/mol glc) | ATPM<br>(mmol /gDW/h) | GAM<br>(mmol /gDW) | Source |
|---------|---------------------|------------------------|-----------------------|--------------------|--------|
| ML308   | 0.038 <sup>a</sup>  | 95.0 <sup>a</sup>      | 0.65 <sup>b</sup>     | 52.7 <sup>b</sup>  | 7      |
| NCM3722 | 0 <sup>a</sup>      | 78.8 <sup>b</sup>      | 0 <sup>a</sup>        | 91.4 <sup>a</sup>  | 14     |

4 <sup>a</sup>. Directly extracted from literature.

5 <sup>b</sup>. Calculated in this work.

6

7 Note:

8  $m$  is the maintenance coefficient, which denotes the rate of substrate consumed for non-growth maintenance.

9  $Y_G = \frac{\Delta x}{(\Delta s)_G} = \frac{\Delta \lambda}{\Delta v_c}$  is the molar growth yield (or true growth yield), which involves the production of a certain  
10 amount of biomass  $\Delta x$  and the consumption of growth-associated substrate  $(\Delta s)_G$  <sup>4</sup>.

11 1 OD = 0.5 gDW was applied for the conversion of GAM for NCM3722 <sup>1</sup>.

12

13

14

15

1

2 **Table S3.** Parameters involved in determining the  $w_c - [g]$  correlation.

| Parameter<br>(Units)  | Description                                                  | Value   |         | Source    |
|-----------------------|--------------------------------------------------------------|---------|---------|-----------|
|                       |                                                              | ML308   | NCM3722 |           |
| $b_1$<br>(mmol/gDW/h) | Rate of glucose uptake for non-growth maintenance            | 3.78E-2 | 0       | 7,14      |
| $b_2$<br>(mmol/gDW/h) | y-axis intercept of $v_c - \lambda$ line for overflow growth | -5.022  | -3.998  | This work |
| $b_3$ (-)             | E and BM sector proteome fraction for non-growth maintenance | 2.31E-2 | 0       | This work |
| $k_1$<br>(mmol/gDW)   | Inverse of molar growth yield for non-overflow growth        | 10.53   | 12.69   | 7,14      |
| $k_2$<br>(mmol/gDW)   | Inverse of molar growth yield for overflow growth            | 17.19   | 17.85   | This work |
| $k_3$ (h)             | Slope of $\phi_E + \phi_{BM}$ against $\lambda$ line         | 1.287   | 1.291   | This work |

3

4

5

6

## 1 References:

- 2 1. Mori, M., Hwa, T., Martin, O. C., De Martino, A. & Marinari, E. Constrained Allocation Flux Balance  
3 Analysis. *PLoS Comput. Biol.* **12**, (2016).
- 4 2. Varma, A., Boesch, B. W. & Palsson, B. Ø. Stoichiometric interpretation of Escherichia coli glucose  
5 catabolism under various oxygenation rates. *Appl. Environ. Microbiol.* **59**, 2465–2473 (1993).
- 6 3. Hui, S. *et al.* Quantitative proteomic analysis reveals a simple strategy of global resource allocation in  
7 bacteria. *Mol. Syst. Biol.* **11**, (2015).
- 8 4. Pirt, S. J. The maintenance energy of bacteria in growing cultures. *Proc. R. Soc. Lond. B* **163**, 224–231  
9 (1965).
- 10 5. Marr, A. G., Nilson, E. H. & Clark, D. J. THE MAINTENANCE REQUIREMENT OF ESCHERICHIA COLI. *Ann.*  
11 *N. Y. Acad. Sci.* **102**, 536–548 (1963).
- 12 6. van Uden, N. Transport-limited growth in the chemostat and its competitive inhibition; A theoretical  
13 treatment. *Arch. Mikrobiol.* **58**, 145–154 (1967).
- 14 7. Wallace, R. J. & Holms, W. H. Maintenance coefficients and rates of turnover of cell material in  
15 Escherichia coli ML308 at different growth temperatures. *FEMS Microbiol. Lett.* **37**, 317–320 (1986).
- 16 8. Nanchen, A., Schicker, A. & Sauer, U. Nonlinear dependency of intracellular fluxes on growth rate in  
17 miniaturized continuous cultures of Escherichia coli. *Appl. Environ. Microbiol.* **72**, 1164–1172 (2006).
- 18 9. Kovárová, K., Zehnder, A. J. & Egli, T. Temperature-dependent growth kinetics of Escherichia coli ML 30  
19 in glucose-limited continuous culture. *J. Bacteriol.* **178**, 4530 LP – 4539 (1996).
- 20 10. Kovárová-Kovar, K. & Egli, T. Growth kinetics of suspended microbial cells: from single-substrate-  
21 controlled growth to mixed-substrate kinetics. *Microbiol. Mol. Biol. Rev.* **62**, 646–666 (1998).
- 22 11. Schmidt, S. K., Alexander, M. & Shuler, M. L. Predicting threshold concentrations of organic substrates  
23 for bacterial growth. *J. Theor. Biol.* **114**, 1–8 (1985).
- 24 12. Rittmann, B. E. & McCarty, P. L. Evaluation of steady-state-biofilm kinetics. *Biotechnol. Bioeng.* **22**,  
25 2359–2373 (1980).
- 26 13. Senn, H., Lendenmann, U., Snozzi, M., Hamer, G. & Egli, T. The growth of Escherichia coli in glucose-  
27 limited chemostat cultures: a re-examination of the kinetics. *Biochim. Biophys. Acta (BBA)-General*  
28 *Subj.* **1201**, 424–436 (1994).
- 29 14. Basan, M. *et al.* Overflow metabolism in Escherichia coli results from efficient proteome allocation.  
30 *Nature* **528**, 99–104 (2015).
- 31 15. Rohwer, J. M., Meadow, N. D., Roseman, S., Westerhoff, H. V & Postma, P. W. Understanding Glucose  
32 Transport by the Bacterial Phosphoenolpyruvate:Glycose Phosphotransferase System on the Basis of  
33 Kinetic Measurements in Vitro. *J. Biol. Chem.* **275**, 34909–34921 (2000).
- 34 16. Gosset, G. Improvement of Escherichia coli production strains by modification of the  
35 phosphoenolpyruvate:sugar phosphotransferase system. *Microb. Cell Fact.* **4**, 14 (2005).
- 36 17. Jahreis, K., Pimentel-Schmitt, E. F., Brückner, R. & Titgemeyer, F. Ins and outs of glucose transport  
37 systems in eubacteria. *FEMS Microbiol. Rev.* **32**, 891–907 (2008).
- 38 18. Ferenci, T. Adaptation to life at micromolar nutrient levels: the regulation of Escherichia coli glucose  
39 transport by endoinduction and cAMP. *FEMS Microbiol. Rev.* **18**, 301–317 (1996).
- 40 19. Hanly, T. J. & Henson, M. A. Dynamic flux balance modeling of microbial co-cultures for efficient batch  
41 fermentation of glucose and xylose mixtures. *Biotechnol. Bioeng.* **108**, 376–385 (2011).
- 42 20. Postma, P. W. & Roseman, S. The bacterial phosphoenolpyruvate: sugar phosphotransferase system.  
43 *Biochim. Biophys. Acta (BBA)-Reviews Biomembr.* **457**, 213–257 (1976).

- 1 21. Wong, P., Gladney, S. & Keasling, J. D. Mathematical model of the lac operon: inducer exclusion,  
2 catabolite repression, and diauxic growth on glucose and lactose. *Biotechnol. Prog.* **13**, 132–143  
3 (1997).
- 4 22. Stock, J. B., Waygood, E. B., Meadow, N. D., Postma, P. W. & Roseman, S. Sugar transport by the  
5 bacterial phosphotransferase system. The glucose receptors of the Salmonella typhimurium  
6 phosphotransferase system. *J. Biol. Chem.* **257**, 14543–14552 (1982).
- 7 23. Bren, A., Hart, Y., Dekel, E., Koster, D. & Alon, U. The last generation of bacterial growth in limiting  
8 nutrient. *BMC Syst. Biol.* **7**, 27 (2013).
- 9 24. Koch, A. L. & Houston Wang, C. How close to the theoretical diffusion limit do bacterial uptake systems  
10 function? *Arch. Microbiol.* **131**, 36–42 (1982).
- 11 25. Zeng, H. & Yang, A. Modelling overflow metabolism in Escherichia coli with flux balance analysis  
12 incorporating differential proteomic efficiencies of energy pathways. *BMC Syst. Biol.* **13**, 3 (2019).
- 13 26. Liu, Y. Overview of some theoretical approaches for derivation of the Monod equation. *Appl.*  
14 *Microbiol. Biotechnol.* **73**, 1241–1250 (2007).
- 15 27. Holms, H. Flux analysis and control of the central metabolic pathways in Escherichia coli. *FEMS*  
16 *Microbiol. Rev.* **19**, 85–116 (1996).

17

18

19
